# Supplementary material for: Societal output and use of research performed by health research groups
Source: Springer Nature journal article supplement (doi:10.1186/1478-4505-8-30), 2010-10-12
Supplement: 12961_2009_152_MOESM3_ESM.pdf [file 12961_2009_152_MOESM3_ESM.pdf]

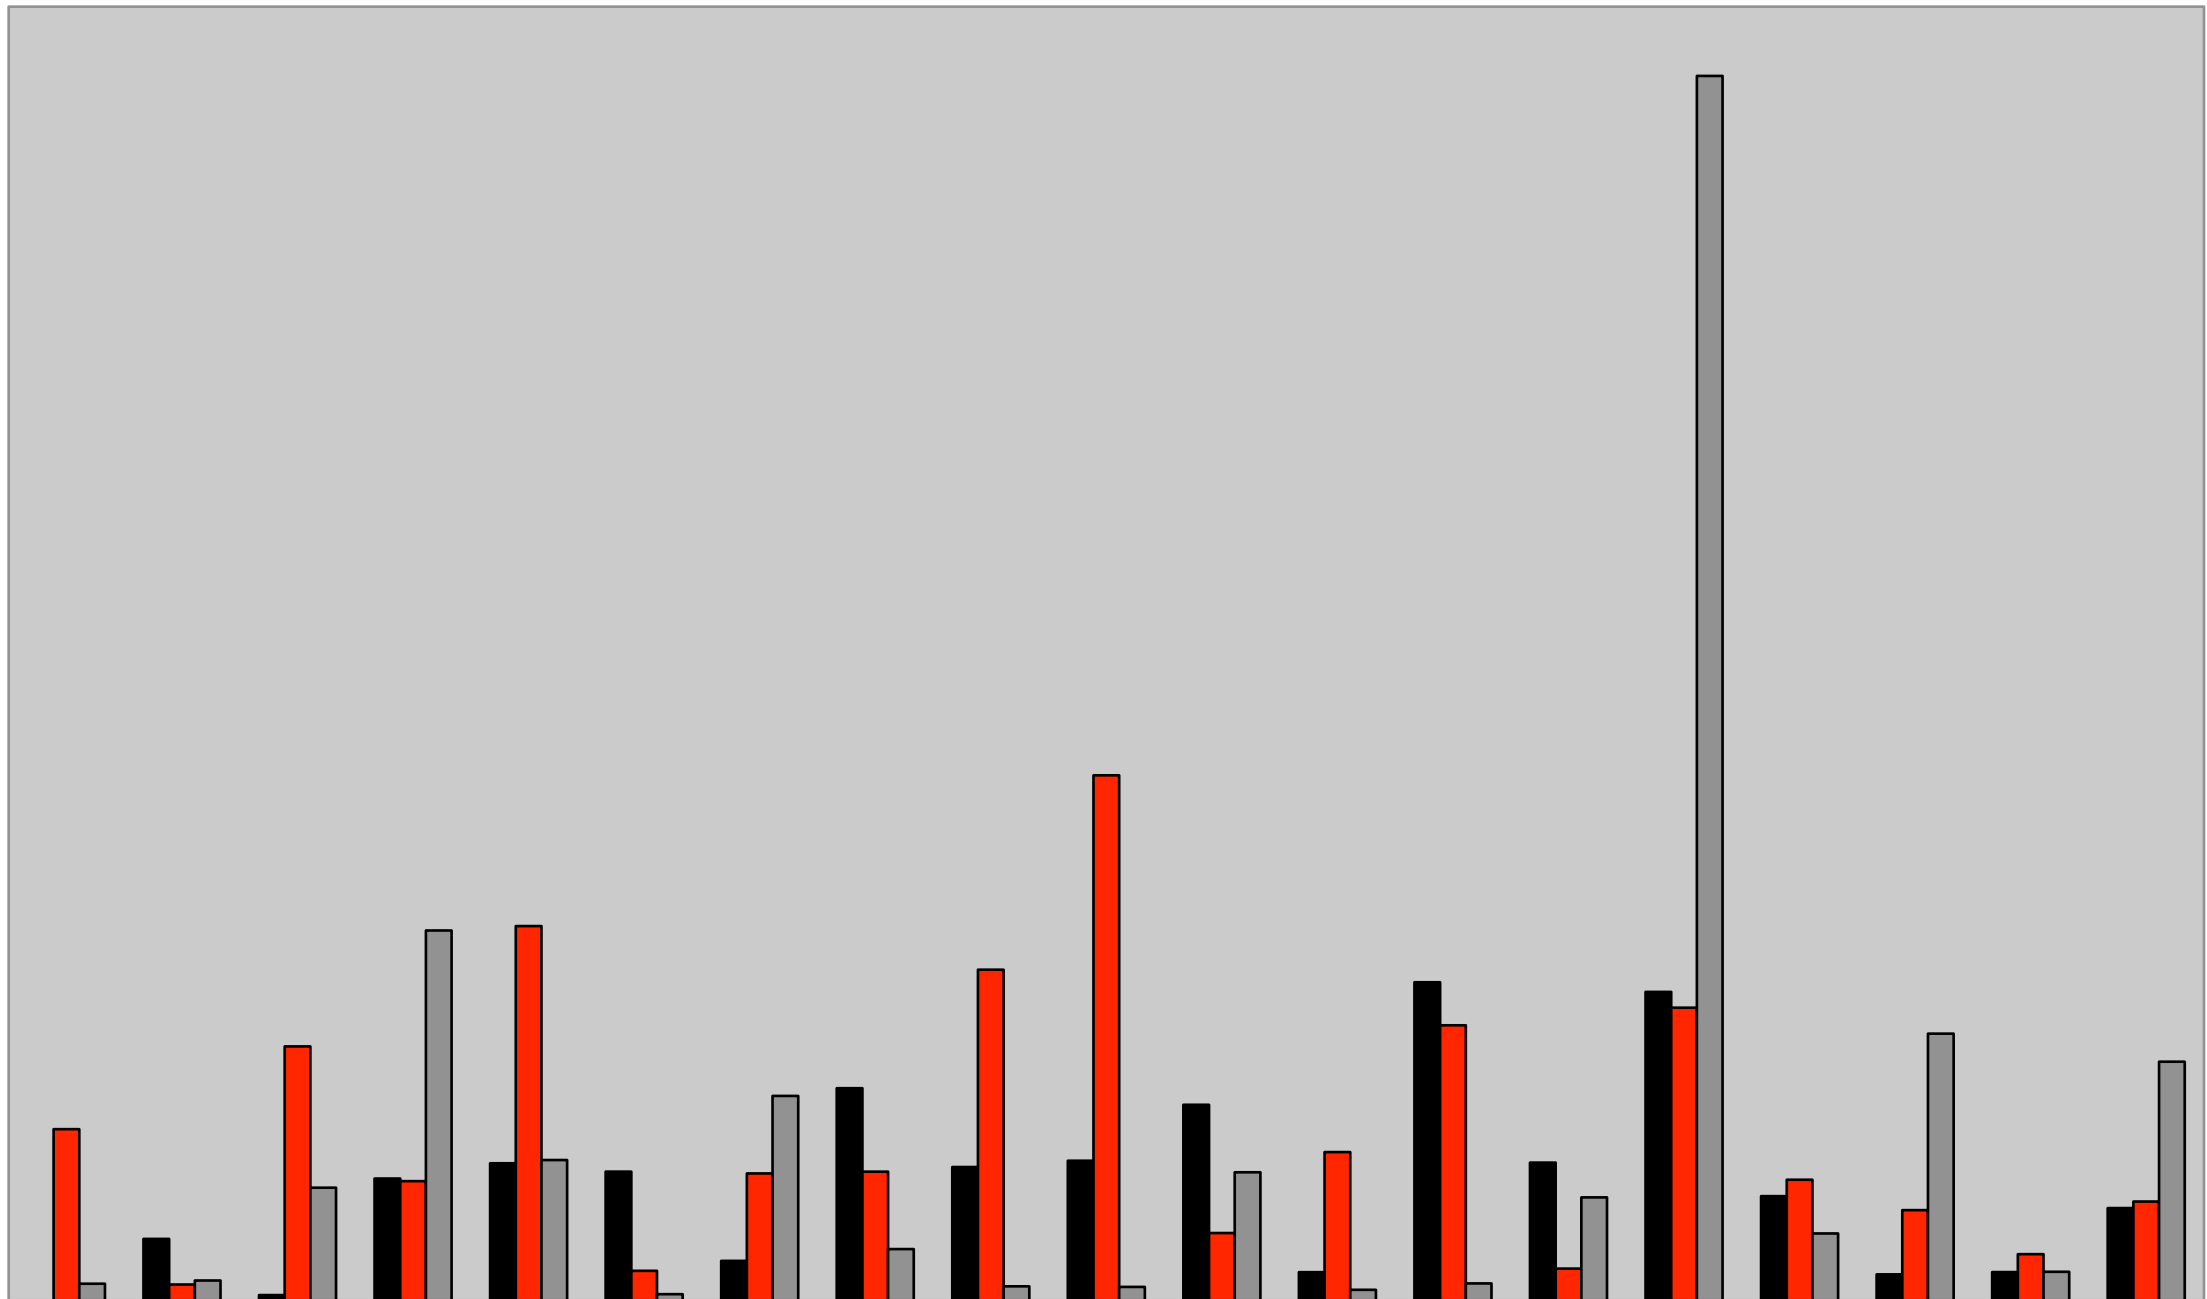

**LUMC departments**

Total general public societal quality
  Total healthcare professionals societal quality
  Total private sector societal quality
