# Supplementary figures and images for: Societal output and use of research performed by health research groups
Source: Springer Nature journal article supplement (doi:10.1186/1478-4505-8-30), 2010-10-12

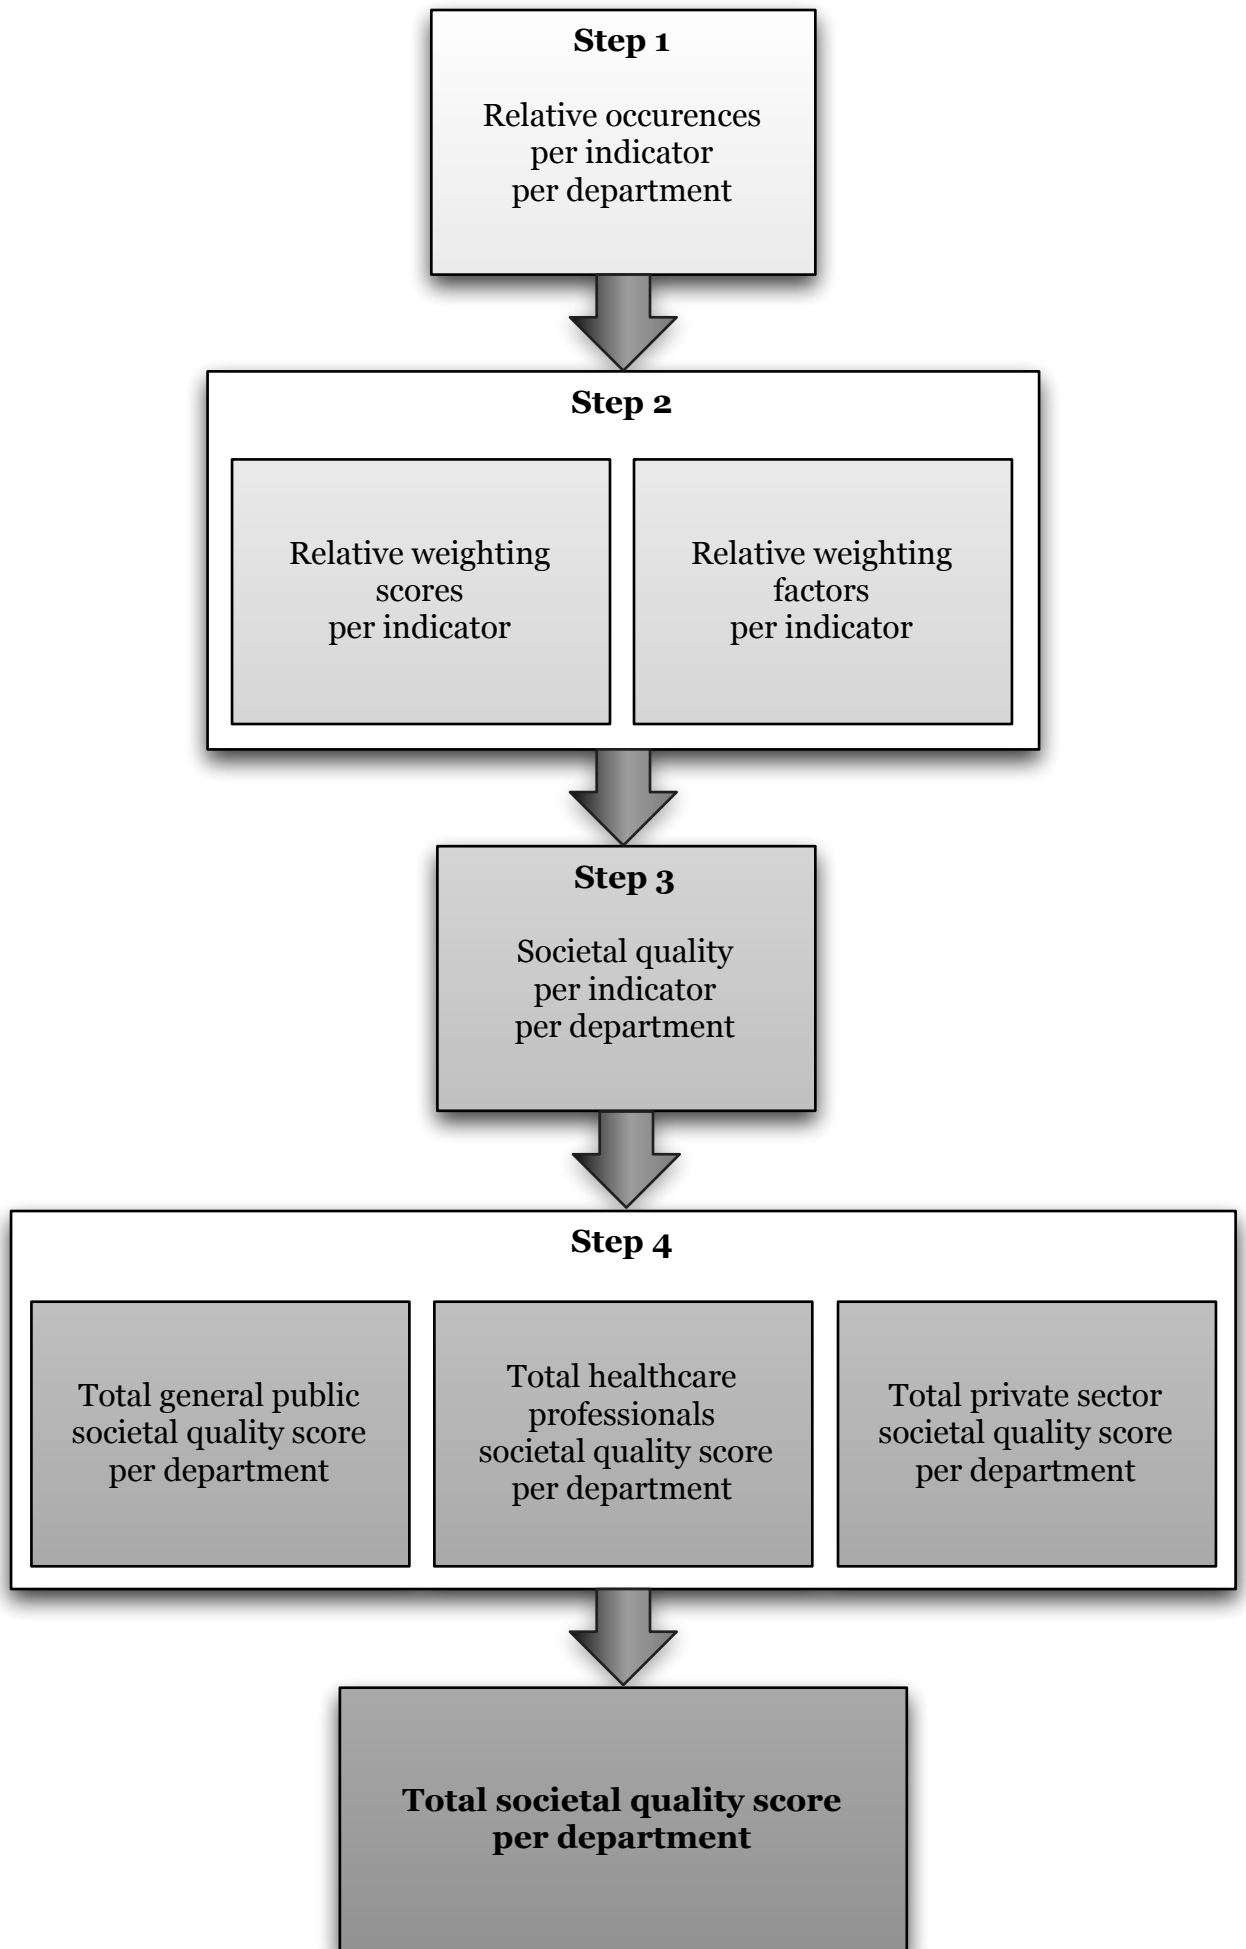

Supplement: 12961_2009_152_MOESM1_ESM.pdf [file 12961_2009_152_MOESM1_ESM.pdf]
